# Supplementary material for: Late Oligocene obliquity-paced contourite sedimentation in the Wilkes Landmargin of East Antarctica: implications for paleoceanographic and ice sheetconfigurations
Source: Copernicus journal article supplement (doi:10.5194/cp-2017-152), 2017-12-05
Supplement: Supplementary file 1 [file cp-2017-152-supplement.zip]

Archive with 2 entries (2 files):
- Supp-CP-Salabarnada.pdf
- ZrBa.xlsx
