# Supplementary material for: Late Oligocene obliquity-paced contourite sedimentation in the Wilkes Landmargin of East Antarctica: implications for paleoceanographic and ice sheetconfigurations
Source: Copernicus journal article supplement (doi:10.5194/cp-2017-152), 2017-12-05
Supplement: Supplementary file 1 [file cp-2017-152-supplement.zip › Supp-CP-Salabarnada.pdf]

## **Supplementary materials**

This file includes:

### **S.1 Lithostratigraphy**

**Figures S1, S2**

### **S.2 Astrochronologic analysys**

**Figures S3-S10**

**R\_analysis**

## S1. Lithostratigraphy

Site U1356 from 392 to 896 mbsf (Cores 42R to 95R) comprises lithostratigraphic Units III to IX described on shipboard during IODP Expedition 318 (Escutia et al., 2011). Here we present a revised and more detailed lithostratigraphic log (Fig. S1) and a schematic facies interpretation (Fig. S2). Facies are interpreted based on a detailed visual description of the cores during a visit to the IODP-Gulf Coast Repository (GCR) following IODP Proceedings methods in Escutia et al. (2011). We aided our interpretations with shipboard magnetic susceptibility data and high-resolution digital-images of the cores, both available from <http://web.iodp.tamu.edu>. In addition, the XRF core scanner data results obtained from the interval between 641.4 and 689.4 mbsf, which is the main focus of this paper, have been interpolated to other intervals down-core where sediments are “in situ.” The stratigraphic column contains information on whether the sediments are deposited “in situ” or are deposited from allochthonous older materials.

Facies are here described briefly from top to bottom. Middle Miocene Facies, are dominated by turbidites and hemipelagites. From 392 to 413 mbsf facies are characterized by an intercalation of bioturbated green and grey claystones, slightly laminated. From 413 to 455 turbidite facies dominate, with an alternation between dark grey claystones with *nereites* ichnofacies and green claystones with silt laminae. Silt laminae have scours at the base, with cross lamination and planar laminations. These facies are included in shipboard lithostratigraphic Unit III. From 455 to 575 mbsf, sediments mostly comprise debris flow (DF) Facies, clast-rich/clast-poor contorted and chaotic intervals with a claystone to sandstone matrix with scours at the base. DF events are locally separated by claystones with silt laminations that present cross and/or planar laminations. Shipboard this corresponded with lithostratigraphic Unit IV, which extended from 459.4-593.8 mbsf. The interval from 575 to 785 mbsf (which includes shipboard lithostratigraphic units V, VI and VII) is characterized by an alternation of two facies (F1 and F2). These facies are explained in detail in the main text of the article, and are composed of an alternation of bioturbated green claystones with thin silt laminae with planar and cross-bedded laminations presenting different traction and suspension structures (F1). These are interbedded with highly bioturbated, thicker pale-brown, silty-claystones (F2). This alternation is disrupted from 710 to 730 mbsf by a MTD slump facies. From 785 to 879 mbsf (within shipboard lithostratigraphic unit VIII) slump facies prevail. Slump facies consist predominantly of allochthonous stratified and chaotic sediments of similar lithology to F1 and F2. The interval from 879 to 895 corresponds with lithostratigraphic unit IX described on shipboard. This unit comprises sediments from the middle Eocene and the earliest Oligocene consisting of bioturbated purple silty claystones with some laminations. Erosion/non-deposition surfaces are

present within this facies. They are intercalated with coarser green micaceous (very shiny) (sandy) silty-claystone. Laminations with ripples and pinstripe and cross-lamination are also observed. This facies are intercalated with MTD facies composed of these same sediments. The interval between 895 and 896 mbsf is within shipboard lithostratigraphic unit X and is characterized by a lithological change to Eocene green sands Facies.

Site U1356  
IODP Exp. 318  
Cores 42-95R

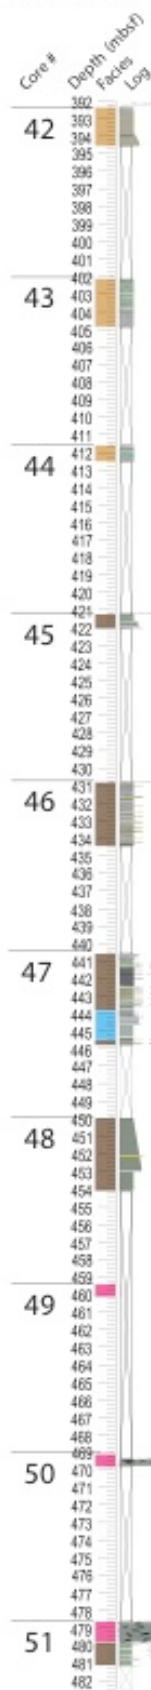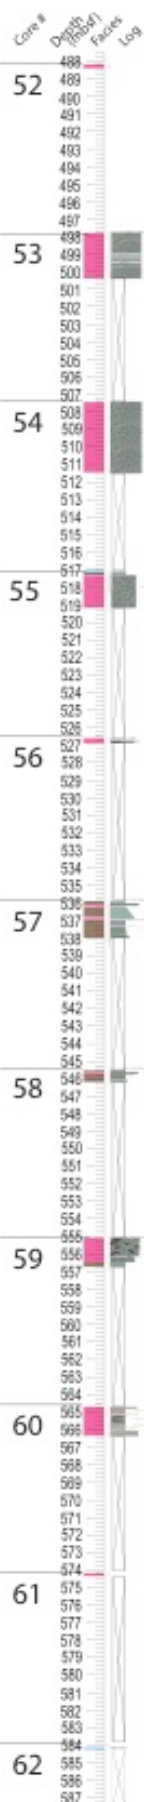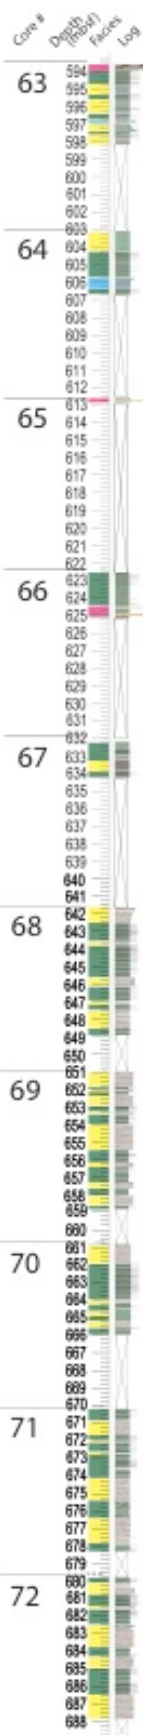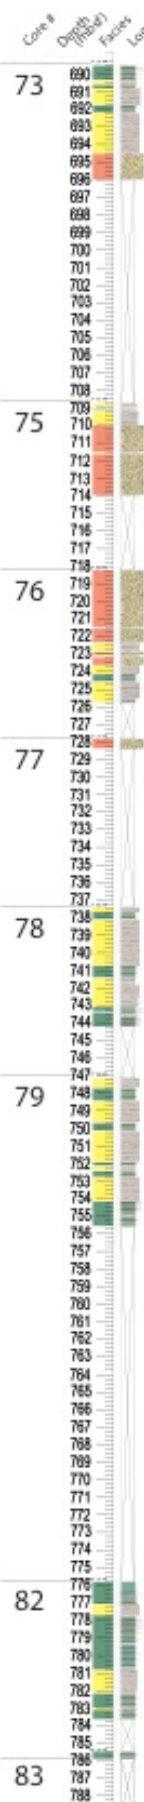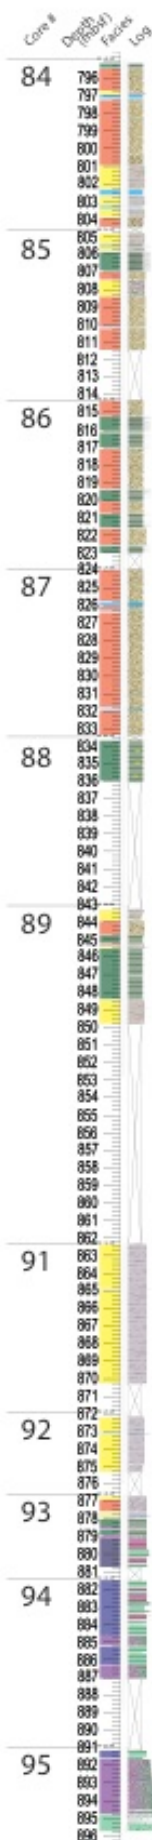

# LEGEND U1356 CORES 42R-95R

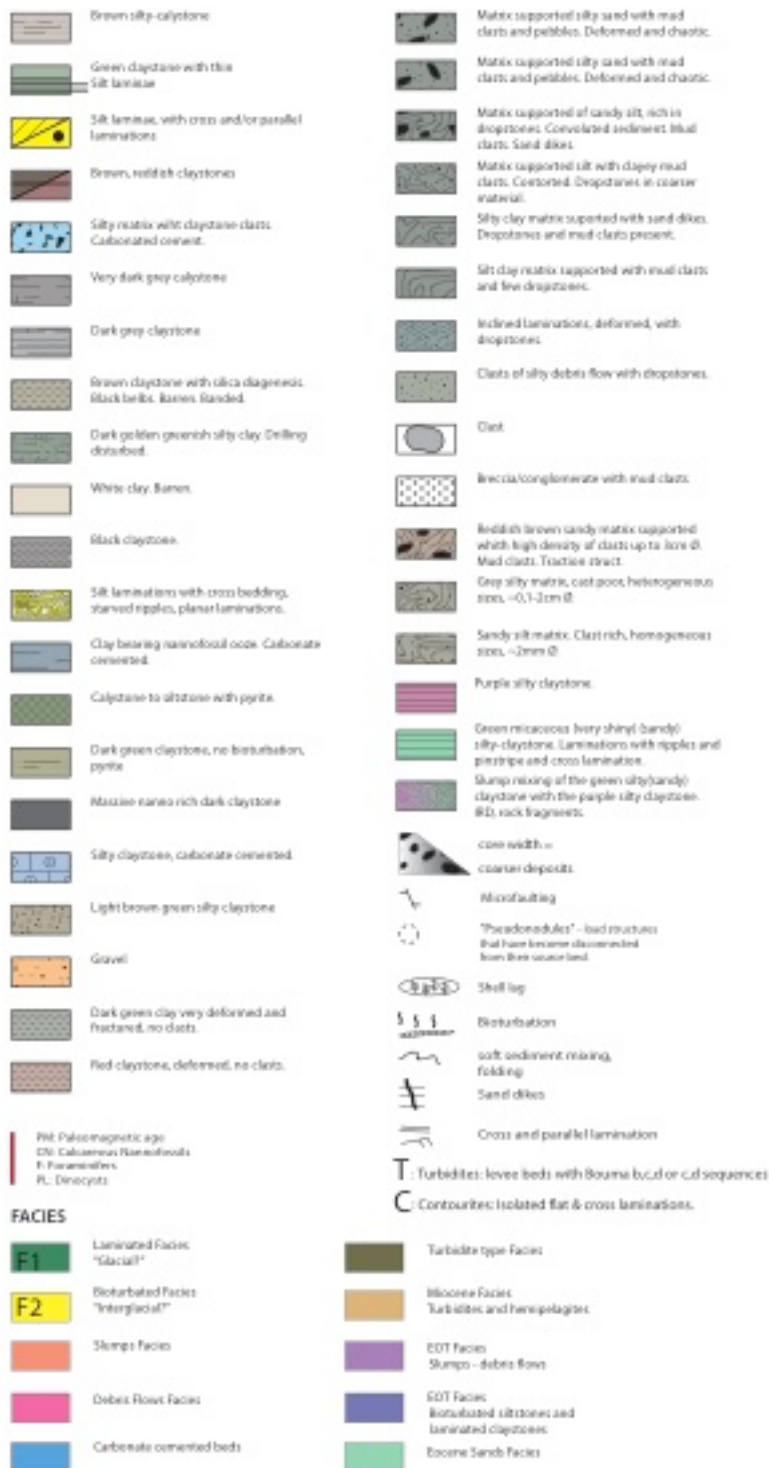

**Fig. S1:** IODP Site U1356 exp. 318 from 42R to 95R (392 to 896 mbsf). Detailed lithostratigraphic log and facies interpretation with its correspondent legend.

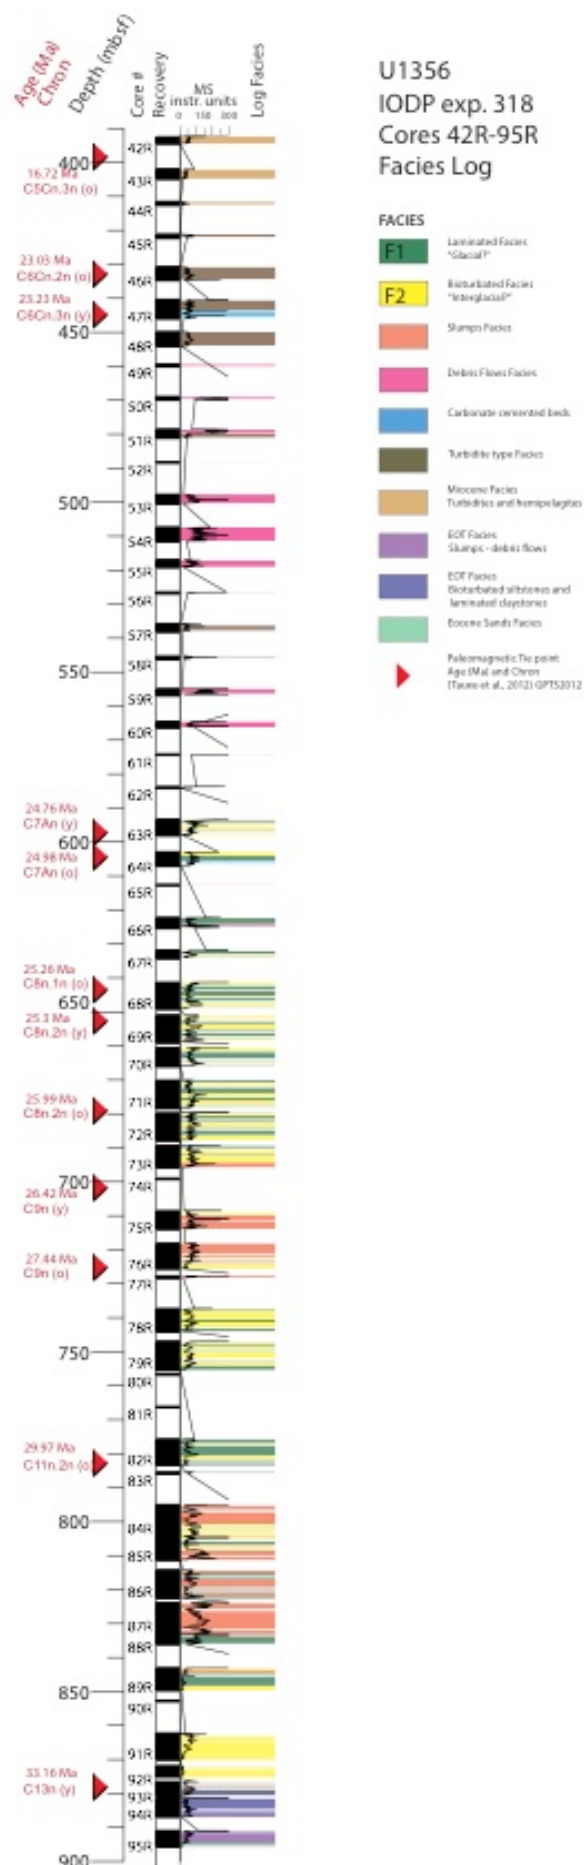

**Fig. S2:** Schematic Facies Log with Magnetic Susceptibility (MS) plotted. Paleomagnetic tie points are also present. Ages from Tauxe et al., 2012 are updated to GPTS 2012.

## **S.2 Astrochronologic analysys**

### **Materials and methods**

We followed the procedures published by Meyers et al. (2012) and Wanlu Fu et al. (2016) in order to generate spectral analysis on our data.

We selected Zr/Ba ratio as we consider this ratio to integrate and summarize the processes shaping our facies model, showing clearly the marked cyclicity present.

#### **Data preparation:**

In order to remove the long-term trend data series were detrended, outliers were removed, and sampling interval was linearly interpolated in order to resample the dataset to an even spacing of 2cm. Average sedimentation rates between the two paleomagnetic tie end points were linearly interpolated and is 5cm/kyr for the investigated interval. Age model is calibrated to the Geologic Timescale 2012 (GPTS 2012, Table 1).

A clear and statistically significant cyclicity is observed in Ba, Zr and Zr/Ti every 2m (0.5 cycles/m), and less significant ones but also reliable at 4.67m (0.21 cycles/m), and 1m (0.94 cycles/m). On the basis of the calculated sedimentation rate, the cycles above (0.5 cycles/m) account for 40 Kyr. After determining the significant frequency, we filtered the Zr/Ba dataset (at depth domain) at 0.5 frequency in order to extract the wavelet and compare it with obliquity signal for that period of time. Cycles can be correlated one to one with a total of 23 cycles of obliquity (Fig. S3). After initial analysis we proceed with Astrochron Evolutive Average Spectral Misfit method (Meyers et al., 2012). Astrochron package is prepared to resolve unevenly sampled series, and changing sedimentation rates.

#### **Time-frequency analysis:**

Evolutive Harmonic Analysis (EHA; Fig. S4) of the prepared Zr/Ba (in depth scale) data provides an evaluation of changes in the spectral features through depth/time. EHA employs five  $3\pi$  DPSS tapers, and a moving window of 15 m. Significant frequencies are retrieved for further study.

#### **Astrochronologic testing:**

The Evolutive Average Spectral Misfit method (Meyers et al., 2014) (E-ASM; five  $3\pi$  tapers; searching to the mean Nyquist frequency of 1.504221 cycles/m) was used to test a range of plausible timescales and simultaneously evaluate the reliability of the presence of astronomical

cycles. The eccentricity, obliquity and precession target periods were determined from La04 (Laskar et al., 2004)) using the interval from 25.0 – 26.4 Ma: 400.00 kyr (E1), 131.58 kyr (E2), 99.01 kyr (E3), 40.49 kyr (O1), 32.79 kyr (O2), 20.70 kyr (P1), 19.69 kyr (P2) and 17.06 kyr (P3).

The Zr/Ba MTM Harmonic F-test results of the EHA (Fig. 6) are evaluated using a grid of 100 sedimentation rates spanning 3 cm/Kyr to 10 cm/Kyr. This range of sedimentation rates encompasses the long-term average sedimentation rate for the section based on available paleomagnetic constraints with a total duration of 0.71 Ma and a total stratigraphic thickness between 30 – 40 m given the range of plausible correlation horizons for the section. We interpolate an average sedimentation rate of 5 cm/Kyr .

All spectral peaks above 90% F-test confidence level were evaluated using E-ASM, and Monte Carlo significance testing utilizing 10,000 simulations. Results with Null Hypothesis Significance Levels (Ho-SL) less than or equal to 0.1% were identified (Fig. S5).

Astronomical tuning:

Frequency domain minimal tuning (Meyers et al., 2001) is used for tracking obliquity in EHA harmonic F-test for the calibrated periods and sedimentation rates. Spatial frequencies are afterwards converted to sedimentation rates using average period of 41 Kyr (Fig. S6) and a time-space map is created with a new calibrated time series. Time series is afterwards anchored to our paleomagnetic tie points (Fig. S7).

MTM and EHA results on the tuned data provide further evidence of the presence of precession, obliquity and eccentricity cycles, supporting the obliquity tuning (Fig. S8).

Significant Harmonic F-test peaks that achieve 95% CL are: 102.77 Kyr, 69.26 Kyr, 40.84 Kyr, 30.05 Kyr, 22.27 Kyr, 20.68 Kyr (Fig. S8).

The new time-scale is used to tune the other records (Zr/Ti; Ca/Ti; MS; Ba). EHA is then applied to tuned records in order to see the frequencies that appear (Fig. S9).

Orbital frequencies were tested in each core section individually in the Zr/Ba dataset in the depth scale in order to assure that cyclicity is not an artefact related to the gaps in the series (Fig. S10).

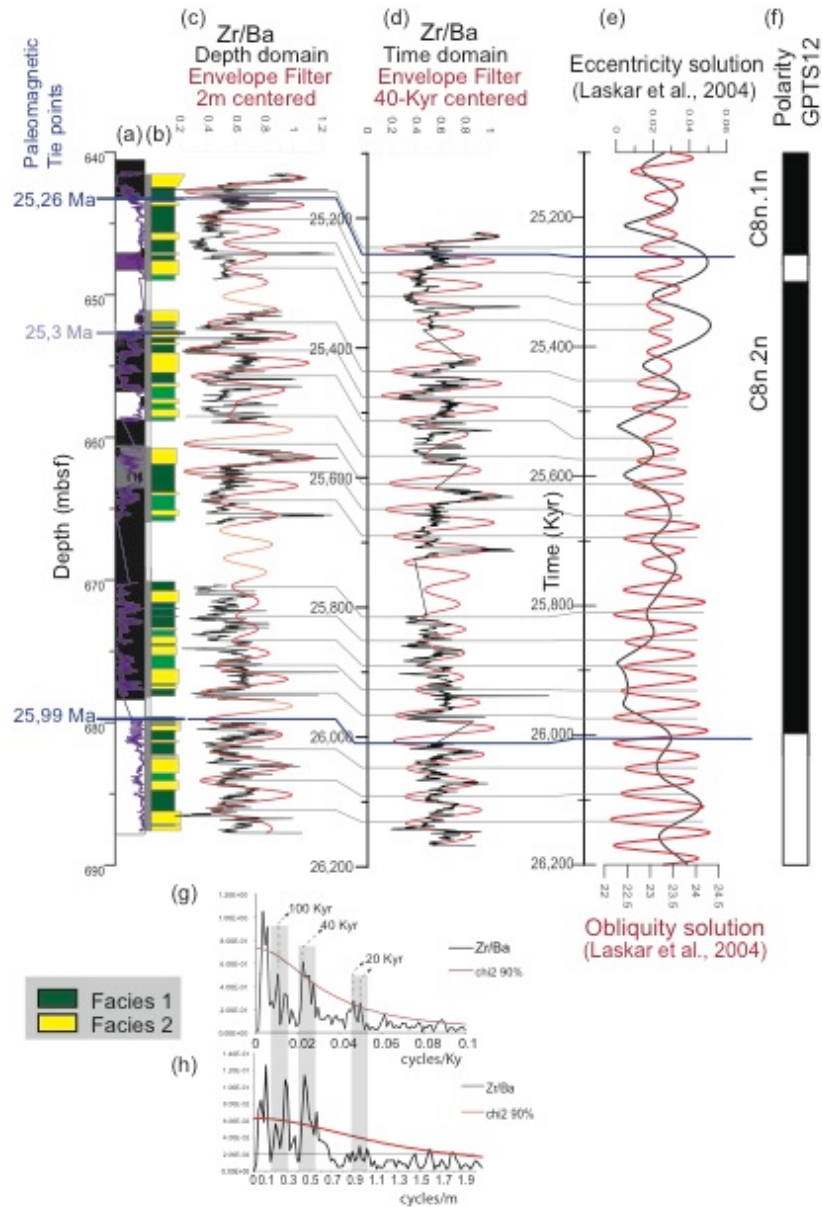

**Fig. S3:** Tuning of Zr/Ba to the obliquity solution. Zr/Ba (in the depth domain) is tuned to the obliquity solution cycle by cycle. Tuning of Zr/Ba record (in depth scale) and bandpass filtering were done in Analyseries (Paillard et al., 1996). (a) Magnetostratigraphic chrons (Tauxe et al., 2012); (b) schematic stratigraphic log; (c) Zr/Ba data in depth scale with the envelope filter centred at 2m (in red); (d) Zr/Ba data in time scale using paleomagnetic tie points and a linear sedimentation rate, with the envelope filter centred at 40 Kyr (in red); (e) Eccentricity and obliquity solutions (Laskar et al., 2004); (f) Polarity chrons from the GPTS2012; (g) Blakmann-Tukey in the Zr/Ba data in time domain (not tuned), with statistical (>90%) periodic peaks in the 40 Kyr and 20 Kyr periodicities; (h) Blakmann-Tukey in the Zr/Ba data in depth domain, with statistical (>90%) periodic peaks.

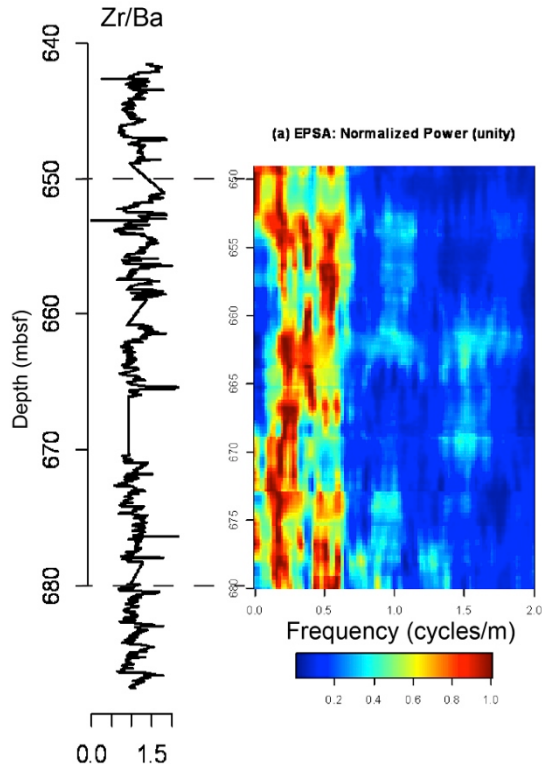

**Fig. S4:** Evolutive Harmonic Analysis (EHA) in depth scale Zr/Ba data. The detrended Zr/Ba data is linearly interpolated to a constant sample spacing of 2 cm prior to analysis. EHA employs with 3DSDP tapers and a 15 window.

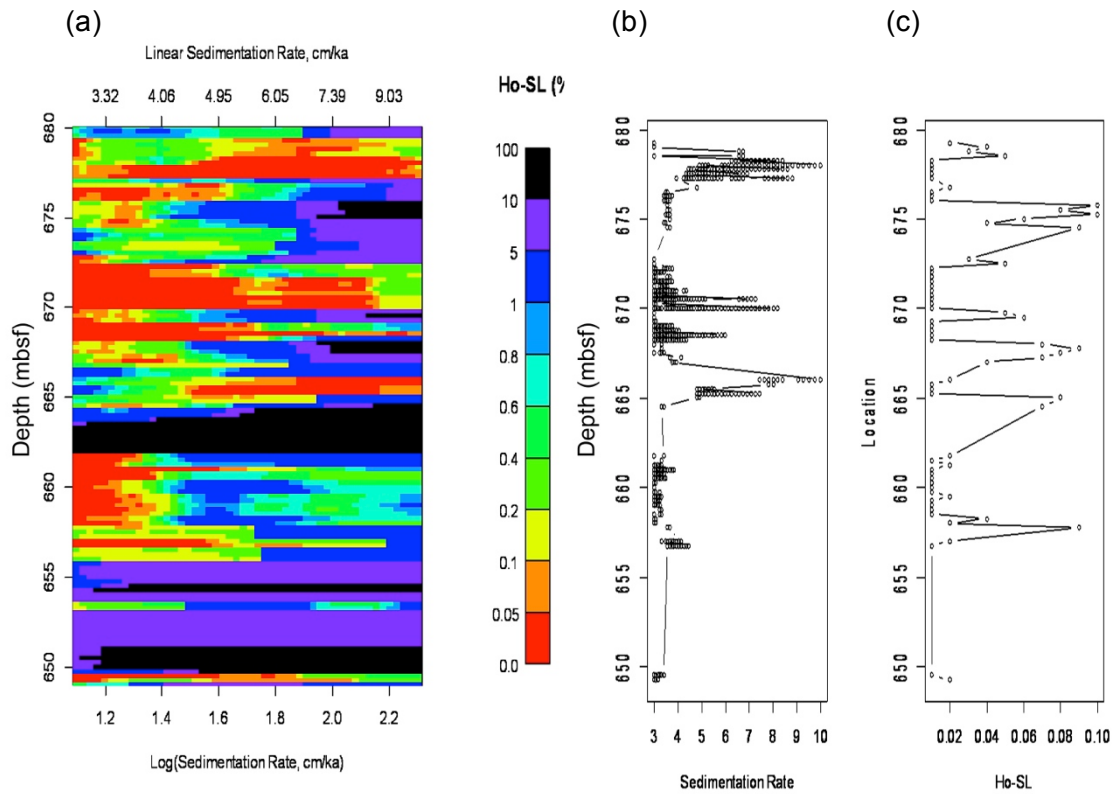

**Fig. S5:** Astrochronologic testing using evolutive ASM analysis. (a) Evolutive ASM plot,

displaying Ho-SL values (90% confidence level), across sedimentation rates spanning 3 to 10 cm/kyr. (b-c) Summary of evolutive ASM results, using a threshold Ho-SL value of 0.1 to identify optimal sedimentation rates. (b) displays each sedimentation rate, and (c) displays the associated Ho-SL.

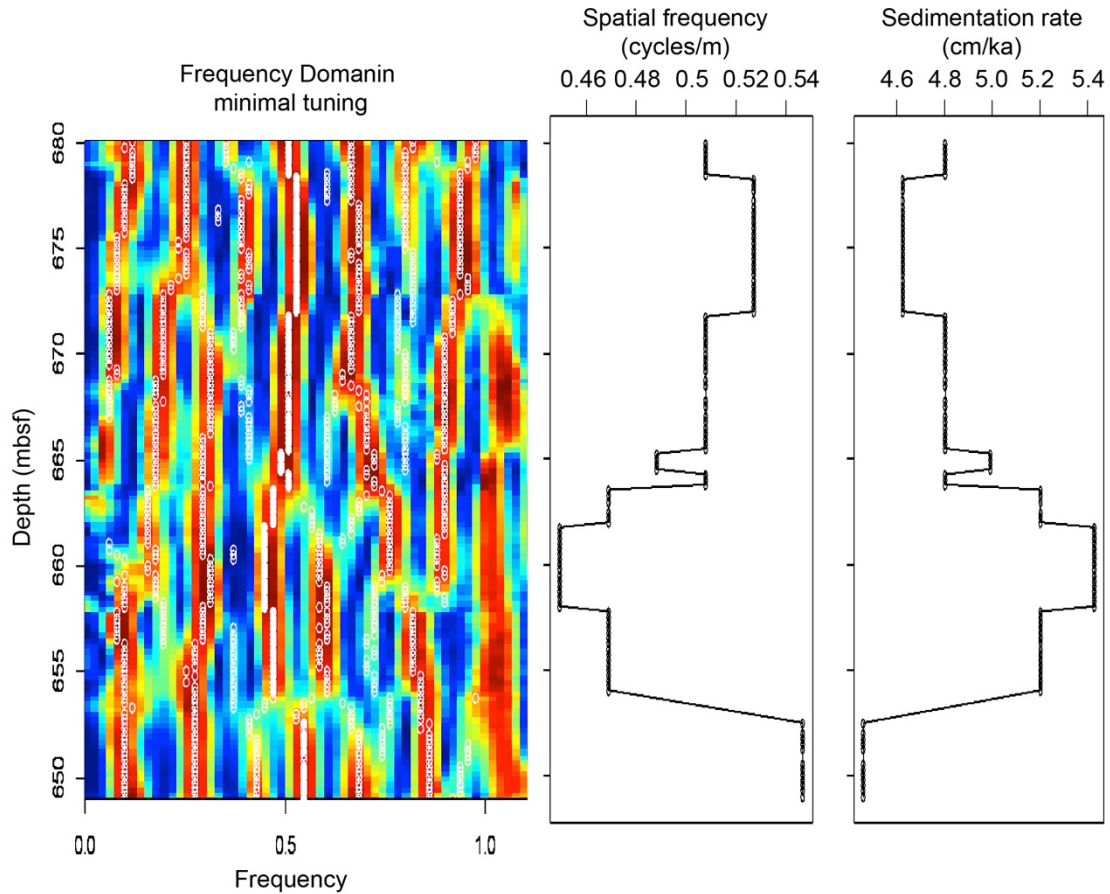

**Fig. S6:** Frequency tracking for minimal tuning. The obliquity cyclicity (41 Kyr) can be tracked in the EHA harmonic F-test confidence level results by setting the  $f_{min}=0.01$  and  $f_{max}=0.4$  based on the spatial frequencies calculated by EASM results. Calculated sedimentation rates based on spatial frequency tracking.

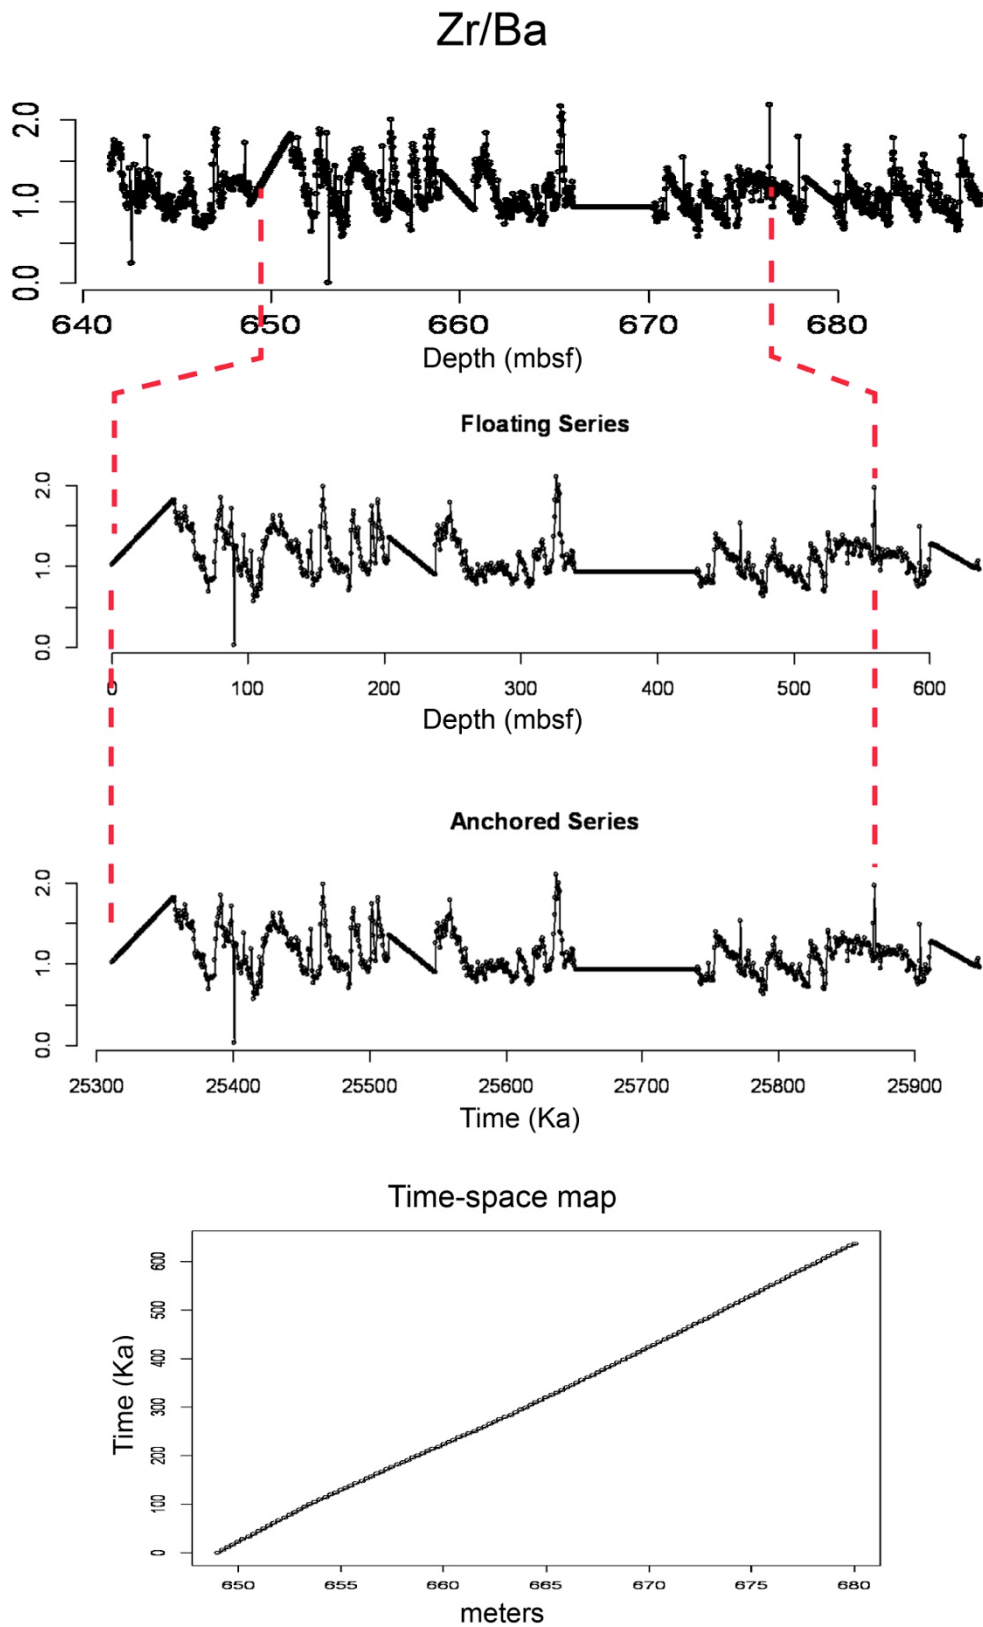

**Fig. S7:** Tuned record and depth-time plot derived by frequency domain minimal tuning to the obliquity cycle. The red dotted lines show the correlated depth and time.

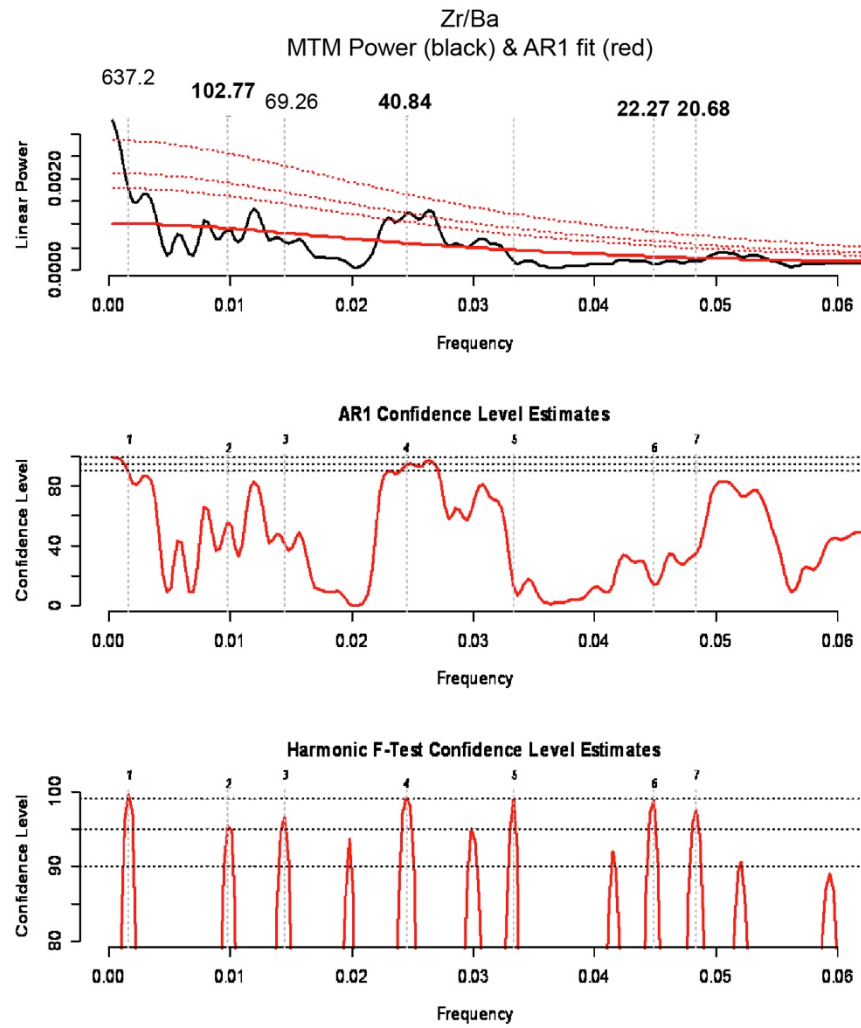

**Fig. S8:** MTM results of the tuned data with the major periods in kyr. These peaks achieve the 95% confidence level for both the MTM harmonic F-test and the AR1 red noise model or the AR1 noise model only.

Zr/Ba Tuned  
EHA with 300win

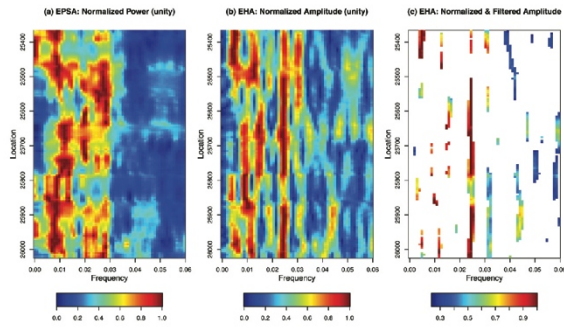

MS Tuned  
EHA with 300win

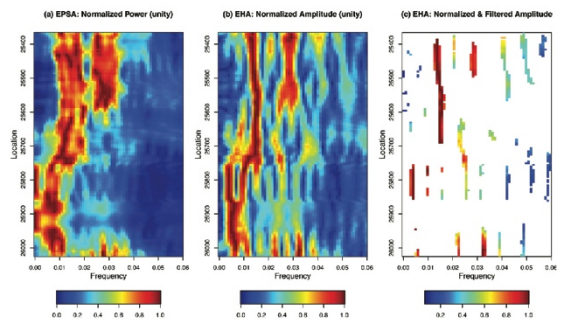

Zr/Ti Tuned  
EHA with 300win

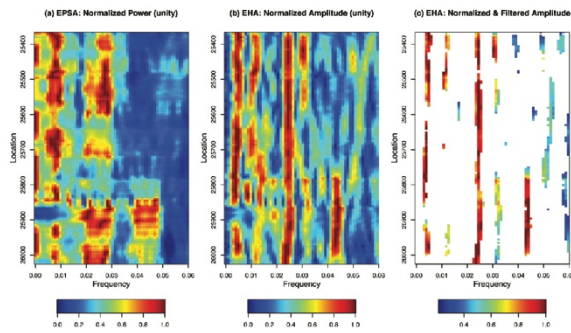

Ba Tuned  
EHA with 300win

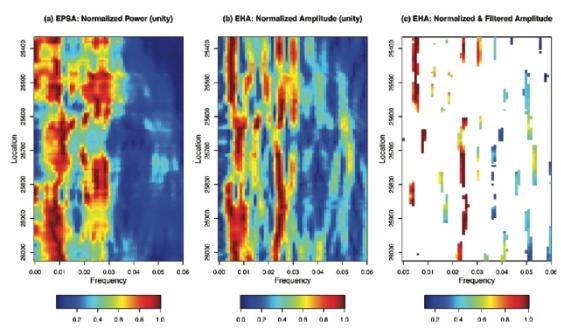

Ca/Ti Tuned  
EHA with 300win

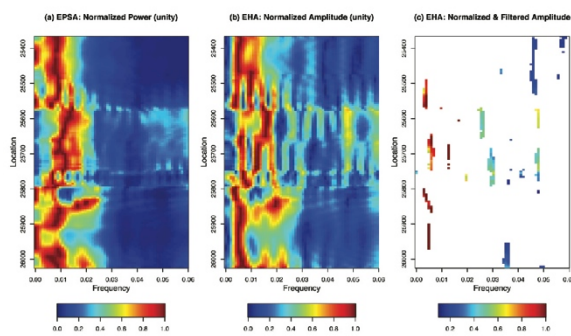

ETP Solution  
EHA with 200win

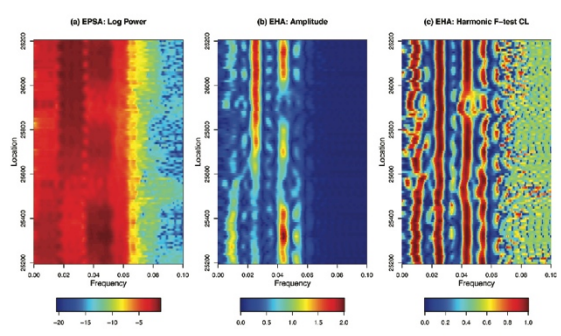

**Fig. S9:** Following Zr/Ba tuning (a), MS (b), Zr/Ti (c), Ba (d), and Ca/Ti (e) have been tuned. EHA analysis was applied in order to depict the frequencies. EHA on the ETP solution is also added in order to compare the resulting frequencies (f).

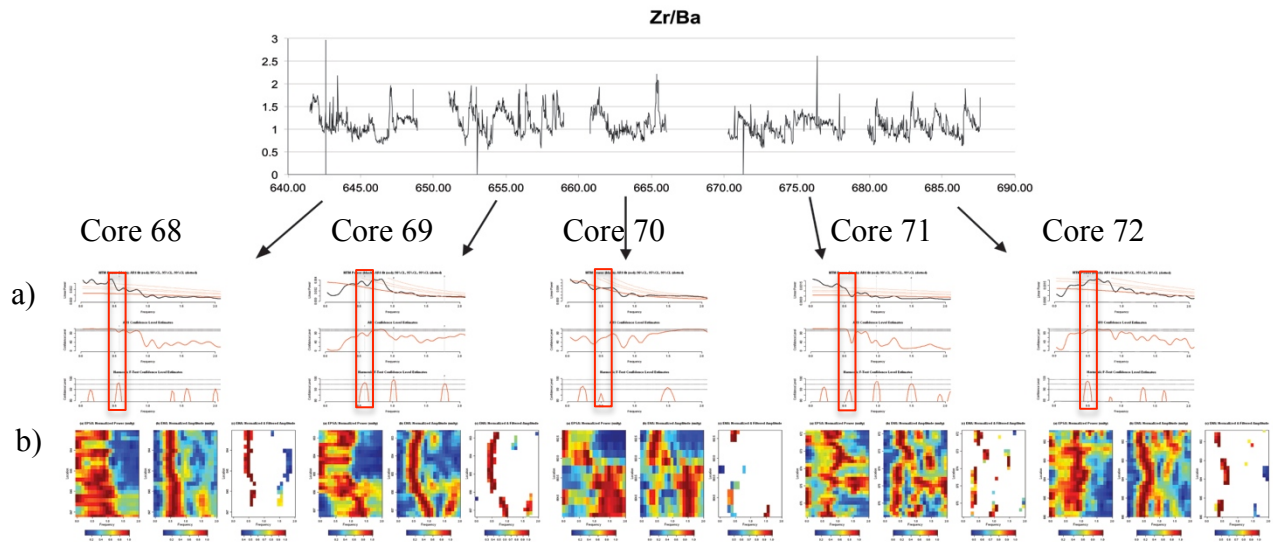

**Fig. S10:** Spectral analysis over individual core sections for the Zr/Ba dataset on the depth scale. The 0.5 cycle/m (that counts for obliquity) achieve >90% significance in all cores except for core 70 where smaller frequencies seem to dominate. Changes in peak frequency seem to be dominated by slightly changes in sedimentation rate. Each core was analysed by a) MTM and b) EHA with a 5 m window.

## R\_analysis

```
#####
# (1) LOAD THE R-PACKAGE 'ASTROCHRON'
#####
library(astrochron)

#####
# (2) READ DATA FILE
#####
# Read the carbon isotope data from file 'CarbonIso.csv'
dat<-read(d=0)

#####
# (3) PREPARE TIME SERIES
#####
# The median sampling interval of the prepared data is 0.02 m, and the mean
sampling interval is 0.023 m
# Resample Zr/Ba data to 2.5 cm sampling grid, using piecewise linear
interpolation
ZrBa<- linterp(dat,dt=0.025)

#####
# (4) PERFORM EVOLUTIVE HARMONIC ANALYSIS
#####
mtmML96(ZrBa,xmax=2,pl=2,siglevel=.90,sigID=T)
mtm(ZrBa,xmax=2,pl=2,sigID=T)
# Use a 12 meter window, with five 3pi DPSS tapers.
# * Search up to the mean Nyquist frequency of 1.504221 cycle/m
# * Output F-test confidence level estimates for evolutive average spectral misfit (ASM)
analysis.
prob=eha(ZrBa,fmax=2,output=4,genplot=4,pl=2,ydir=-1,win=15)

#####
# (5) IDENTIFY TARGET PERIODS FOR AVERAGE SPECTRAL MISFIT ANALYSIS
#####
# Obliquity and precession terms from Laskar et al. (2004)
model=etp(tmin=25000,tmax=26400)
eha(model,win=200,fmax=0.1,sigID=T,pad=10000)
mtm(model,xmax=0.1,pl=2,sigID=T)

#####
# (6) EVOLUTIVE AVERAGE SPECTRAL MISFIT ANALYSIS
#####
# Set up analysis parameters:
# * Astronomical target frequencies are determined from Laskar et al. (2004)
target=c(1/404,1/124,1/95,1/54,1/41,1/29,1/23,1/19)
#Ray=(1/N*Ax) on N= number of points in data series and Ax= sampling resolution of data
series
# * Use average sampling interval to estimate the Nyquist frequency (for 1/(0.025m sampling *
2) Fnyq=(1/2*Ax)
rayleigh=0.0217
nyquist=20
# * Average sedimentation rates is around 5cm/Kyr
# The total duration between the youngest and oldest age is 0.71 Ma +/- ? Ma.
```

```

# Given the range of plausible correlation horizons into the LO section,
# the total stratigraphic thickness can range from 30 m to 40 m.
# Execute evolutive ASM analysis. This will take 10-20 minutes to complete.
res1=eAsm(prob,target=target,rayleigh=rayleigh,nyquist=nyquist,sedmin=3,sedmax=10,numsed
=100,siglevel=0.95,iter=10000,output=4)
# Track Ho-SL minima from evolutive ASM results
# * Identify those results with Ho-SL less than or equal to 0.1%
pl(1); eAsmTrack(res1[1],threshold=0.1,ydir=1)

#####
# (7) EXAMINE SELECTED SPECTRA AND ASM-CALIBRATED PERIODS
#####
# F-test CL spectrum from 43.965 m
# Calculate calibrated periods in kyr (observed)

prob_674.53=extract(prob,get=674.53)
1/(peak(prob_674.53,level=0.9)[2]*0.025)

prob_670.03=extract(prob,get=670.03)
1/(peak(prob_670.03,level=0.9)[2]*0.025)

prob_656.03=extract(prob,get=656.03)
1/(peak(prob_656.03,level=0.9)[2]*0.025)

prob_661.03=extract(prob,get=661.03)
1/(peak(prob_661.03,level=0.9)[2]*0.025)

#####
# (8) ASTRONOMICALLY-TUNE Zr/Ba DATA USING
# FREQUENCY-DOMAIN MINIMAL TUNING (Meyers et al., 2001)
#####
# Track obliquity in EHA harmonic F-test confidence level given the ASM-calibrated periods
# Track obl term on the basis of the ASM calibrated sedimentation rates
# Note that the Rayleigh frequency is 0.0217 cycles/m
freqs=trackFreq(prob,fmin=0.023,fmax=1,threshold=0.9)
# convert spatial frequencies to sedimentation rates using average period of 41 kyr
sedrate=freq2sedrate(freqs,period=41,ydir=-1)
sedrate
# View the calibrated sedimentation rates on depth sedrate
# Integrate the sedimentation rate curve to create a time-space map
time=sedrate2time(sedrate)
# View the calibrated time series
time

# The duration of specific interval can be calculated by the output of sedrate and time
# Tune the ZRBA series using the time-space map
tuned=tune(ZrBa,time)
#####
# (9) PREPARE TUNED SERIES AND EVALUATE SPECTRA
#####
# Interpolate the tuned series. Median sampling interval is 0.5 kyr and mean is 0.55 kyr.
# Will use AR1 test; use a conservative interpolation to avoid introducing serial correlation.
datatuned=linterp(tuned,dt=0.6)
# Perform MTM analysis on the tuned series
spec=mtm(datatuned,tbw=2,pl=2,siglevel=0.95,xmax=0.06,output=1,sigID=T)

```

```

# identify periods of AR1 CL peaks that achieve the 90% AR1 CL
1/peak(cb(spec,c(1,4)),level=95)[2]
# Perform EHA on the tuned series
ZrBa_final<-read(d=0)
pwr=eha(datatuned,fmax=0.06,output=2,ydir=-1,win=250)
plotEha(pwr,pl=1,ydir=-1)

#####
# (10) BANDPASS FILTERING AND ECCENTRICITY AMPLITUDE
MODULATION ANALYSIS
#####
# Perform bandpass-filtering on the tuned series to extract short eccentricity (E2+E3)
e23_data=bandpass(datatuned,flow=0.006,fhigh=0.011,xmax=0.02)
# Perform bandpass-filtering on the eccentricity terms from Laskar et al. (2011)
model=getLaskar("la10d")
model=iso(model,xmin=25000,xmax=26400)
e23_model=bandpass(model,flow=0.006,fhigh=0.011,xmax=0.02) #short-term
eccentricity
# Evaluate the alignment between the amplitude envelope of the filtered short-term eccentricity
and the filtered long-term eccentricity
am_data=hilbert(bandpass(datatuned,flow=0.006,fhigh=0.011))
pl(1)
plot(s(am_data),type="l",ylim=c(-3,3))
lines(s(e1_data),col="red")

#Anchor the tuned data to a tie point from the time scale where 606.226 is equivalent to 678.78
ZrBa_tuned2=anchorTime(datatuned,606.2262,25990,flipOut=T,timeDir=2)

write.csv(ZrBa_tuned2,file="ZrBa_tuned_at_606.226to25990.csv") #Save data

Tune other data series and analyse with EHA:

Ba<-read(d=0)
Ba_tuned=tune(Ba,time)
eha(linterp(Ba_tuned,dt=0.5),fmax=0.06,output=2,ydir=-1,win=150)
Ba_tuned=anchorTime(datatuned,678.9,25990,flipOut=T,timeDir=2)

MS<-read(d=0)
MS_tuned=tune(MS,time)
eha(linterp(MS_tuned,dt=0.5),fmax=0.06,output=2,ydir=-1,win=150)
MS_tuned=anchorTime(datatuned,678.9,25990,flipOut=T,timeDir=2)

```
