# Supplementary material for: Late Oligocene obliquity-paced contourite sedimentation in the Wilkes Landmargin of East Antarctica: implications for paleoceanographic and ice sheetconfigurations
Source: Copernicus journal article supplement (doi:10.5194/cp-2017-152), 2017-12-05
Supplement: Supplementary file 1 [file ZrBa.xlsx]

## Sheet: Hoja1
Data from: Ariadna Salabarnada et al., Late Oligocene obliquity-paced contourite sedimentation in the Wilkes Land margin of East Antarctica: implications for paleoceanographic and ice sheet configurations
Site U1356 IODP Exp. 318
Depth CSF-A (m)	Zr/Ba
641.53	1.3862
641.54	1.45942
641.56	1.56021
641.58	1.44708
641.6	1.41245
641.62	1.59597
641.64	1.35547
641.65	1.40666
641.66	1.54563
641.68	1.58521
641.7	1.57937
641.72	1.78726
641.74	1.70849
641.76	1.65875
641.78	1.71028
641.8	1.63631
641.82	1.60292
641.84	1.58444
641.86	1.59527
641.88	1.68989
641.89	1.58687
641.9	1.58312
641.92	1.63454
641.94	1.63169
641.96	1.5936
641.98	1.60664
642	1.64057
642.02	1.65182
642.04	1.74837
642.06	1.61616
642.08	1.53059
642.1	1.62224
642.12	1.44016
642.13	1.33952
642.14	1.322
642.16	1.09214
642.18	1.3159
642.2	1.17661
642.22	1.24212
642.24	1.08894
642.26	1.13801
642.28	1.17489
642.29	1.27505
642.3	1.19203
642.32	1.13099
642.33	1.06797
642.34	1.02613
642.36	1.07991
642.38	1.06059
642.4	0.95038
642.42	0.985994
642.44	0.967795
642.46	0.95735
642.48	0.918936
642.5	0.942738
642.52	1.08496
642.54	1.0263
642.56	1.09833
642.57	1.13977
642.58	1.40679
642.59	2.97439
642.6	0
642.62	0.981709
642.64	1.15312
642.66	1.08715
642.68	1.05031
642.69	0.983352
642.7	1.1088
642.72	1.00224
642.74	1.02935
642.76	1.03719
642.78	1.05689
642.8	1.06379
642.81	0.950363
642.82	1.08878
642.84	0.999053
642.86	1.60096
642.88	1.00544
642.92	0.942582
642.94	1.01731
642.96	0.927826
642.98	0.873713
643	0.939343
643.02	1.02236
643.03	1.35286
643.06	0.960417
643.08	0.971104
643.1	1.71256
643.11	1.04185
643.12	1.24288
643.13	0.960147
643.14	0.991521
643.16	0.958924
643.18	1.05693
643.2	1.08165
643.22	1.06919
643.23	1.01253
643.24	0.984827
643.26	0.915107
643.28	0.979405
643.3	1.01361
643.32	1.38746
643.34	1.06744
643.36	1.2084
643.38	1.16336
643.4	1.11772
643.42	2.18372
643.44	1.39773
643.46	0.950085
643.48	1.14163
643.5	1.17618
643.52	1.33282
643.54	1.36518
643.56	1.17837
643.58	1.26527
643.6	1.31844
643.62	1.25382
643.64	1.34645
643.66	1.38251
643.68	1.18535
643.7	1.26225
643.72	1.26701
643.74	1.07377
643.77	1.17856
643.78	1.21158
643.8	1.22159
643.82	1.19663
643.83	1.12512
643.91	1.11181
643.92	1.04641
643.96	1.03889
643.97	1.05463
643.98	1.14441
644	1.18896
644.01	1.11962
644.02	1.50267
644.04	1.16288
644.06	1.3776
644.08	0.92311
644.1	1.00587
644.12	1.06937
644.14	0.994595
644.16	0.958035
644.18	1.0313
644.2	1.02069
644.22	0.934126
644.24	0.93665
644.26	0.995116
644.3	1.03985
644.31	1.02108
644.32	0.930697
644.34	1.16747
644.35	0.969952
644.36	0.958864
644.38	0.897051
644.4	0.858325
644.42	0.71446
644.44	0.843428
644.46	1.03732
644.48	0.917328
644.49	0.941754
644.5	0.899374
644.52	0.994642
644.54	0.952437
644.55	0.935852
644.56	1.06927
644.58	0.885066
644.6	1.10768
644.62	0.981826
644.64	1.00261
644.65	0.918429
644.66	1.03843
644.68	1.03332
644.69	0.953219
644.7	1.00103
644.72	0.957898
644.74	0.888418
644.76	0.811203
644.78	1.05587
644.8	0.845036
644.81	0.781818
644.82	0.864595
644.84	0.853045
644.86	0.855484
644.88	0.77159
644.9	0.827292
644.92	1.06672
644.93	0.883389
644.94	0.867129
644.96	0.867823
644.98	0.826092
645	0.919939
645.02	0.807465
645.04	0.85979
645.06	0.925437
645.08	0.931777
645.12	0.966554
645.14	0.991447
645.16	1.0107
645.18	0.907214
645.19	1.01377
645.22	0.937689
645.24	1.10462
645.26	1.01433
645.27	0.937684
645.28	1.10072
645.3	0.913074
645.32	0.976933
645.33	0.940862
645.34	0.946863
645.36	0.951103
645.38	0.932847
645.4	0.994791
645.41	0.948587
645.42	0.894825
645.44	0.954132
645.46	1.04531
645.47	0.947368
645.48	1.09759
645.5	0.970057
645.52	1.06013
645.54	0.972968
645.56	0.949446
645.58	1.34311
645.6	1.30428
645.62	1.15639
645.64	1.15638
645.66	1.14934
645.68	1.12237
645.7	1.211
645.72	1.12463
645.74	1.23575
645.76	1.23452
645.78	1.26728
645.8	1.18325
645.82	1.086
645.84	1.13759
645.86	1.07043
645.88	1.07425
645.9	0.944688
645.92	1.1202
645.94	1.05478
645.96	0.914386
645.98	0.935179
646	0.894643
646.02	0.810941
646.03	0.764095
646.04	0.772207
646.06	0.794864
646.08	0.72717
646.1	0.76338
646.14	0.695661
646.16	0.701114
646.18	0.750868
646.2	0.738986
646.22	0.731859
646.24	0.748641
646.25	0.749026
646.26	0.673771
646.28	0.704691
646.3	0.702261
646.32	0.783363
646.34	0.73104
646.36	0.694416
646.38	0.748033
646.4	0.741906
646.42	0.757699
646.44	0.758276
646.46	0.83747
646.48	0.691426
646.5	0.688435
646.52	0.694579
646.53	0.677802
646.54	0.668132
646.56	0.756201
646.58	0.759024
646.6	0.835339
646.61	0.744444
646.62	0.786439
646.64	0.815941
646.66	0.797861
646.68	0.821856
646.7	0.815074
646.72	0.754515
646.74	0.7914
646.76	0.831687
646.78	0.775366
646.8	0.770946
646.81	0.812767
646.82	0.742528
646.83	0.746263
646.84	0.790474
646.86	1.02307
646.87	0.967055
646.88	0.897095
646.9	0.791477
646.92	0.794414
646.93	0.872624
646.96	1.18899
646.98	1.45318
647	1.56647
647.02	1.74984
647.05	1.97482
647.06	1.71247
647.08	1.83593
647.09	1.81191
647.11	1.90949
647.13	1.76118
647.15	1.75278
647.17	1.44814
647.18	1.15059
647.21	1.1619
647.23	1.17734
647.25	1.1709
647.26	1.2579
647.3	0.981515
647.32	0.995149
647.33	1
647.35	0.95829
647.37	1.03297
647.41	0.906638
647.43	1.05711
647.45	1.04716
647.46	1.02248
647.47	1.00046
647.51	1.36757
647.53	1.34313
647.55	1.21634
647.57	1.29601
647.59	1.31003
647.6	1.19248
647.61	1.18764
647.63	1.26489
647.65	1.21243
647.66	1.24602
647.67	1.2522
647.69	1.25489
647.71	1.22472
647.73	1.26976
647.75	1.21081
647.76	1.25192
647.78	1.22446
647.8	1.18439
647.81	1.19409
647.82	1.20471
647.84	1.23206
647.86	1.18756
647.88	1.14866
647.9	1.15931
647.92	1.21312
647.94	1.11147
647.96	1.21768
647.97	1.22737
647.98	1.23273
648	1.1053
648.02	1.24289
648.04	1.28405
648.06	1.26717
648.08	1.252
648.1	1.22419
648.12	1.25754
648.14	1.30161
648.16	1.25
648.18	1.29027
648.19	1.21059
648.2	1.25623
648.22	1.31136
648.23	1.27841
648.24	1.22894
648.26	1.28774
648.28	1.25978
648.3	1.29399
648.32	1.19833
648.35	1.2588
648.36	1.29474
648.38	1.29709
648.4	1.26703
648.42	1.26024
648.43	1.1926
648.44	1.14072
648.46	1.28781
648.48	1.29885
648.5	1.13024
648.53	1.16128
648.54	1.22254
648.55	1.23229
648.56	1.15897
648.58	1.24568
648.59	1.29568
648.6	1.88635
648.62	1.22057
648.64	1.15907
648.65	1.16141
648.66	1.21716
648.67	1.25532
648.7	1.11867
648.72	1.10832
648.74	1.0909
648.76	1.13161
648.78	1.20106
648.8	1.11418
648.82	1.02781
648.84	1.13108
648.86	1.25044
648.88	1.1644
648.9	0.962752
651.07	1.82738
651.08	1.8002
651.1	1.733
651.12	1.79617
651.13	1.57113
651.14	1.61227
651.16	1.61316
651.18	1.48981
651.2	1.66432
651.22	1.60136
651.24	1.69903
651.26	1.53821
651.28	1.50065
651.3	1.47587
651.32	1.48753
651.34	1.3698
651.36	1.67446
651.38	1.59445
651.4	1.48184
651.41	1.72872
651.42	1.71382
651.44	1.84558
651.46	1.5569
651.47	1.51238
651.48	1.56042
651.5	1.57638
651.52	1.54053
651.53	1.42047
651.54	1.43998
651.56	1.52034
651.58	1.4752
651.6	1.38435
651.61	1.50644
651.62	1.40781
651.64	1.49107
651.66	1.51387
651.67	1.48129
651.68	1.51684
651.7	1.43766
651.72	1.32847
651.74	1.32702
651.76	1.07091
651.77	1.10408
651.78	1.05674
651.8	1.08662
651.81	1.23724
651.82	1.15547
651.84	1.09609
651.86	1.0443
651.88	1.19031
651.9	1.05587
651.92	1.08449
651.94	1.13592
651.96	1.00673
652	0.955156
652.02	0.983529
652.04	1.29071
652.06	1.02266
652.08	0.961466
652.1	0.874889
652.12	0.867824
652.14	0.84869
652.16	0.879658
652.18	0.632915
652.2	0.807999
652.22	0.78796
652.24	0.824648
652.26	0.856695
652.28	0.83363
652.3	0.81211
652.32	0.80553
652.34	0.849654
652.39	0.854517
652.4	0.88943
652.41	1.28905
652.43	1.32229
652.45	1.48812
652.47	1.45247
652.49	1.54782
652.51	1.57718
652.53	1.62071
652.55	1.5908
652.57	1.68226
652.59	1.9744
652.61	1.85999
652.63	1.55061
652.65	1.3587
652.67	1.51873
652.69	1.41531
652.71	1.28385
652.73	1.1879
652.75	1.4316
652.77	1.50169
652.79	1.30471
652.81	1.29107
652.83	1.30674
652.85	1.32319
652.87	1.16659
652.89	1.34605
652.91	1.54533
652.93	1.46828
652.95	1.93086
652.97	1.56746
652.99	1.30879
653.01	1.21878
653.03	0
653.05	1.21382
653.09	1.2507
653.12	1.05904
653.13	1.36952
653.15	1.19916
653.17	0.988764
653.18	1.06147
653.19	0.900838
653.23	0.98719
653.27	0.954114
653.28	0.988348
653.29	1.00245
653.33	0.842828
653.34	0.913296
653.38	1.43609
653.39	1.04405
653.41	1.00331
653.43	0.98067
653.45	1.11476
653.47	1.07385
653.49	1.02813
653.5	1.04709
653.51	0.968052
653.53	0.896319
653.55	0.971197
653.57	0.912421
653.59	0.855666
653.6	0.867658
653.61	0.803678
653.63	0.796431
653.65	0.863336
653.68	1.28061
653.7	0.745955
653.72	0.691605
653.73	0.662593
653.74	0.645053
653.76	0.549376
653.78	0.574706
653.8	0.698484
653.81	0.636971
653.82	0.728636
653.84	0.755548
653.86	0.690105
653.88	0.607517
653.89	0.697257
653.9	0.66096
653.92	0.870882
653.94	0.766348
653.98	1.09452
654	0.827054
654.02	0.726404
654.04	0.677381
654.06	0.774229
654.08	1.10504
654.1	1.20049
654.12	1.30414
654.14	1.32744
654.16	1.24004
654.18	1.22781
654.19	1.33472
654.2	1.29793
654.22	1.26342
654.24	1.3837
654.26	1.33277
654.28	1.38106
654.3	1.4956
654.32	1.53044
654.33	1.40648
654.34	1.41469
654.36	1.47872
654.38	1.46112
654.4	1.3855
654.42	1.49763
654.43	1.42075
654.44	1.43918
654.46	1.57947
654.48	1.6271
654.5	1.59009
654.52	1.52751
654.54	1.58893
654.56	1.44268
654.58	1.48555
654.6	1.47793
654.62	1.47352
654.64	1.39398
654.66	1.5038
654.68	1.3868
654.7	1.40981
654.72	1.38478
654.74	1.50426
654.76	1.69576
654.78	1.48661
654.8	1.5603
654.82	1.62651
654.84	1.41501
654.86	1.46396
654.87	1.50944
654.88	1.41621
654.9	1.39413
654.92	1.35045
654.94	1.37692
654.96	1.4341
654.98	1.37339
655	1.42988
655.02	1.28082
655.04	1.23048
655.06	1.25682
655.08	1.19864
655.12	1.30966
655.14	1.21325
655.16	1.37218
655.18	1.27562
655.2	1.24844
655.22	1.14483
655.24	1.18914
655.26	1.19536
655.28	1.25626
655.3	1.20126
655.32	1.20158
655.34	1.20879
655.36	1.23524
655.37	1.40183
655.41	1.18614
655.42	1.09035
655.44	1.17126
655.45	1.09435
655.46	1.12321
655.48	1.29678
655.5	1.12142
655.52	1.16217
655.53	1.06377
655.54	1.15719
655.56	0.982727
655.58	0.95203
655.6	0.897119
655.62	0.925501
655.63	0.880929
655.64	0.84252
655.7	0.966672
655.72	0.914673
655.74	0.915444
655.75	0.986156
655.76	0.872999
655.78	0.836232
655.8	0.974971
655.81	0.858469
655.82	0.93082
655.84	1.78913
655.85	1.22636
655.86	1.06988
655.88	1.0321
655.89	1.34539
655.9	1.88212
655.92	1.0397
655.94	1.00634
655.96	1.33862
655.98	0.85686
656	0.876509
656.02	0.777094
656.04	0.747017
656.06	0.79428
656.08	0.884963
656.1	0.828831
656.12	0.829965
656.14	0.814774
656.16	0.855701
656.17	0.873212
656.18	0.801321
656.2	0.97195
656.22	0.8983
656.24	0.890566
656.26	0.864975
656.28	0.86956
656.3	0.962167
656.32	1.61515
656.34	1.8233
656.36	1.72199
656.38	2.00112
656.4	1.8542
656.42	1.78388
656.44	1.78559
656.46	1.61369
656.48	1.50455
656.5	1.62161
656.52	1.16237
656.54	1.28881
656.56	1.23368
656.58	1.42219
656.62	1.26324
656.64	1.41568
656.66	1.18861
656.68	0.993805
656.7	1.11817
656.72	1.09029
656.74	1.04277
656.76	1.04156
656.78	1.01779
656.8	1.01725
656.82	0.949056
656.84	1.01096
656.86	0.921922
656.88	0.960728
656.9	1.04512
656.92	1.14956
656.94	1.07454
656.96	1.02067
656.98	1.06702
657	0.901443
657.02	0.959527
657.04	0.968343
657.05	0.978106
657.06	1.0458
657.08	1.01365
657.1	1.03512
657.12	0.978466
657.14	0.977588
657.16	1.03082
657.18	0.902778
657.19	0.980678
657.2	0.945252
657.22	0.961191
657.24	0.995264
657.26	0.929499
657.28	0.982705
657.29	0.946088
657.3	0.982889
657.32	1.0028
657.34	0.895341
657.36	0.83947
657.38	0.711155
657.4	0.586223
657.41	0.715965
657.42	0.695044
657.44	1.20516
657.46	1.34529
657.48	1.47888
657.5	1.53017
657.52	1.65341
657.54	1.75407
657.56	1.62475
657.58	1.61587
657.6	1.39093
657.62	1.39496
657.64	1.3991
657.65	1.43085
657.66	1.25699
657.68	1.34802
657.7	1.23712
657.72	1.7689
657.74	1.24443
657.76	1.31412
657.78	1.24286
657.8	1.22058
657.81	1.109
657.82	1.14501
657.84	0.991201
657.86	1.00017
657.88	1.05039
657.9	1.09182
657.92	0.969877
657.94	0.972198
657.96	0.961469
657.98	0.999286
658	1.01169
658.02	1.03687
658.03	1.00432
658.04	0.990562
658.06	0.889971
658.1	0.977507
658.12	0.966794
658.14	0.853212
658.15	0.87834
658.16	0.908782
658.18	0.95544
658.2	0.949688
658.22	1.26952
658.24	1.76373
658.26	1.63304
658.28	1.79446
658.3	1.54656
658.32	1.44549
658.34	1.35054
658.36	1.1965
658.37	1.10675
658.38	1.07611
658.4	1.04366
658.42	0.98743
658.44	1.02139
658.46	1.23929
658.48	1.86329
658.5	1.79313
658.52	1.85765
658.54	1.69891
658.56	1.64556
658.58	1.41487
658.59	1.52814
658.6	1.533
658.62	1.42427
658.64	1.24322
658.66	1.43211
658.68	1.50697
658.7	1.24016
658.72	1.19366
658.73	1.22742
658.74	1.10697
658.76	1.06584
658.78	1.1463
658.8	1.10944
658.82	1.03549
658.84	1.05507
658.86	1.03354
658.89	1.02595
658.91	1.18252
658.92	1.16181
658.93	1.0432
658.94	1.11768
658.95	1.35887
660.79	0.894186
660.8	1.20041
660.82	1.40611
660.83	1.30257
660.84	1.44289
660.86	1.46139
660.88	1.5069
660.9	1.42139
660.92	1.4374
660.94	1.35117
660.96	1.2298
660.97	1.21992
660.98	1.17978
661	1.24293
661.02	1.52849
661.04	1.40979
661.05	1.39799
661.06	1.46754
661.08	1.29665
661.1	1.40535
661.12	1.5492
661.14	1.51265
661.16	1.47925
661.18	1.47581
661.2	1.38945
661.21	1.29632
661.22	1.35794
661.24	1.42823
661.26	1.45822
661.28	1.64705
661.3	1.53495
661.32	1.6639
661.34	1.5409
661.36	1.56078
661.38	1.68979
661.4	1.9342
661.42	1.53432
661.43	1.57553
661.44	1.36828
661.46	1.34111
661.48	1.30439
661.5	1.43587
661.52	1.38853
661.54	1.50872
661.56	1.46433
661.58	1.28306
661.6	1.3864
661.62	1.31733
661.64	1.3443
661.65	1.30131
661.66	1.32794
661.68	1.22954
661.7	1.25136
661.72	1.25297
661.74	1.39169
661.76	1.29423
661.77	1.28342
661.78	1.36104
661.8	1.1585
661.82	1.15486
661.84	1.17385
661.86	1.16135
661.88	1.0186
661.9	0.981741
661.92	1.18496
661.94	1.01709
661.95	0.958289
661.96	1.17083
661.98	0.934147
662	1.34565
662.02	1.01839
662.04	0.988167
662.07	0.985015
662.08	0.816072
662.09	0.880296
662.11	0.968658
662.13	0.947676
662.14	0.944705
662.15	0.992973
662.17	0.88066
662.19	0.909287
662.21	0.882188
662.22	1.00963
662.25	0.862158
662.26	0.780816
662.27	0.803481
662.29	0.917263
662.3	0.723967
662.31	0.894118
662.33	0.900134
662.35	0.776569
662.37	0.940592
662.39	0.857286
662.41	0.680158
662.43	0.819772
662.45	0.92068
662.47	1.09463
662.49	0.944568
662.51	0.872667
662.53	0.91097
662.55	0.966851
662.57	0.945992
662.59	0.797214
662.61	0.921931
662.62	1.01279
662.63	1.00962
662.65	0.844233
662.67	0.957081
662.7	0.870968
662.73	0.813249
662.75	0.774102
662.77	0.826382
662.79	1.05166
662.81	1.11066
662.83	0.895211
662.85	1.00606
662.87	0.949507
662.89	0.935381
662.91	0.973926
662.93	0.936582
662.95	0.921693
662.97	1.19372
662.99	0.871856
663.03	0.953015
663.04	0.906949
663.05	0.89289
663.07	1.07142
663.08	0.926033
663.09	1.03843
663.11	0.930039
663.13	0.879681
663.15	1.04294
663.17	0.980781
663.19	0.934333
663.23	0.94308
663.25	1.11069
663.27	1.0099
663.28	0.905711
663.29	0.867756
663.31	1.19438
663.32	1.00977
663.33	1.0167
663.34	1.05239
663.35	0.919306
663.37	1.06575
663.38	1.08928
663.39	0.919558
663.41	0.904707
663.43	1
663.47	0.875892
663.49	0.918266
663.51	0.916868
663.53	0.92682
663.56	1.08883
663.57	1.01825
663.59	0.940796
663.61	0.905009
663.63	0.895555
663.65	0.86055
663.67	0.894476
663.69	0.964169
663.71	0.835508
663.73	0.849383
663.75	0.755835
663.77	0.782314
663.79	0.911078
663.81	0.808741
663.82	0.805251
663.83	0.798078
663.85	0.859246
663.87	0.859889
663.89	0.803905
663.91	0.847556
663.93	0.838343
663.95	0.878751
663.97	0.906411
663.98	1.12922
663.99	1.17258
664.01	1.18195
664.03	1.15903
664.05	1.05323
664.07	1.11214
664.09	1.07046
664.1	1.14987
664.11	1.02089
664.13	1.05116
664.15	1.06069
664.16	1.04511
664.17	1.16601
664.19	0.924942
664.2	0.940864
664.21	0.92337
664.23	0.960434
664.25	0.942263
664.27	0.976676
664.29	0.756949
664.31	0.783972
664.33	0.816265
664.35	0.894702
664.37	0.766527
664.38	0.713105
664.39	0.716438
664.41	0.861165
664.43	0.853732
664.45	0.746502
664.47	0.833031
664.49	0.739348
664.51	0.828106
664.53	1.1799
664.55	1.13229
664.57	1.1522
664.59	1.09713
664.6	1.18086
664.61	1.14384
664.63	1.21802
664.65	1.16237
664.67	1.04468
664.69	1.10466
664.71	1.12107
664.72	1.02141
664.73	1.06434
664.75	1.24175
664.77	1.29167
664.79	1.10537
664.81	1.3601
664.84	1.32431
664.85	1.27154
664.87	1.33209
664.89	1.18734
664.92	1.17475
664.93	1.1084
664.94	1.09002
664.96	0.944576
664.98	0.9047
665	0.969945
665.02	0.888576
665.04	0.929943
665.06	0.917847
665.08	0.982996
665.1	0.936271
665.12	0.908302
665.14	1.02455
665.16	1.02184
665.18	1.04393
665.2	1.08083
665.22	1.04808
665.23	1.06055
665.26	1.42429
665.28	1.59528
665.3	1.57314
665.32	2.00898
665.34	2.04803
665.36	2.21508
665.37	2.06855
665.38	1.8496
665.4	1.78028
665.42	1.88642
665.44	2.0844
665.46	2.06698
665.48	1.39252
665.5	1.41938
665.52	1.35989
665.54	1.38453
665.56	1.21978
665.58	1.11022
665.6	1.15871
665.63	1.01224
665.64	0.992433
665.66	0.934472
665.68	0.968699
665.7	1.10049
665.72	1.11162
665.73	1.00694
665.74	1.21557
665.76	1.14542
665.78	1.05012
665.8	1.07227
665.82	1.07152
665.83	1.11505
665.86	1.13497
665.87	1.0292
665.88	1.03525
665.9	0.971594
665.94	1.32546
665.97	1.0144
665.98	1.04128
666	1.00325
666.02	0.935896
670.29	0.927906
670.3	0.876977
670.32	1.00988
670.34	0.92694
670.36	0.926426
670.38	0.937114
670.4	0.83245
670.42	0.765714
670.44	0.749596
670.46	0.752253
670.48	0.862723
670.5	0.829866
670.52	0.87368
670.54	0.764129
670.56	0.813794
670.58	0.797477
670.6	0.818997
670.62	0.809408
670.64	0.777496
670.66	0.884286
670.68	0.874339
670.7	0.857194
670.72	1.50894
670.73	0.832804
670.74	0.800025
670.76	0.845101
670.78	0.848714
670.8	0.822078
670.82	0.788566
670.84	0.793534
670.86	0.850612
670.88	0.80075
670.9	0.770984
670.92	1.0237
670.94	1.28344
670.96	1.27787
670.98	1.4073
671	1.39029
671.02	1.35819
671.04	1.24258
671.05	1.35091
671.06	1.32639
671.08	1.23532
671.1	1.24899
671.12	1.32256
671.14	1.32821
671.16	1.3138
671.18	1.26634
671.2	1.3064
671.21	1.26468
671.22	1.20991
671.24	1.21517
671.26	1.27844
671.28	1.28273
671.3	1.23898
671.31	1.15613
671.37	1.19254
671.38	1.222
671.39	1.14624
671.41	1.1053
671.43	1.08956
671.44	1.2079
671.45	1.14388
671.47	1.15503
671.49	1.0625
671.51	1.05943
671.53	1.12463
671.55	1.14608
671.57	1.11876
671.59	1.15983
671.61	1.08957
671.63	1.06549
671.65	1.08485
671.67	1.09293
671.69	1.12572
671.7	1.10158
671.71	1.11421
671.72	1.05467
671.73	1.05831
671.75	0.919561
671.77	0.89397
671.78	1.01977
671.79	1.06458
671.81	0.853038
671.82	0.983923
671.83	1.54299
671.85	0.908483
671.87	0.932465
671.89	0.802398
671.9	0.901345
671.91	0.970334
671.92	0.957758
671.93	0.926467
671.95	0.931323
671.96	0.849447
671.97	0.87853
672.01	0.838188
672.03	1.08201
672.05	1.0156
672.07	0.847045
672.09	1.2315
672.11	1.11275
672.12	1.09723
672.13	1.19529
672.15	0.952521
672.16	1.01586
672.17	1.00485
672.19	0.865711
672.21	0.874906
672.23	0.891966
672.24	0.806788
672.25	0.781293
672.29	1.09186
672.3	0.858194
672.31	0.938075
672.33	0.872812
672.35	0.872111
672.37	0.910577
672.41	0.836283
672.43	0.868861
672.45	0.738826
672.47	0.879372
672.48	0.795239
672.49	0.82888
672.5	0.789072
672.51	0.851058
672.53	0.656139
672.55	0.618995
672.57	0.763208
672.59	1.12149
672.61	0.779281
672.63	0.572409
672.65	0.733922
672.67	0.707647
672.69	0.785888
672.71	0.604622
672.73	0.751162
672.75	1.04489
672.77	1.12765
672.79	0.985734
672.81	1.1718
672.83	1.09937
672.84	1.03041
672.85	1.11204
672.87	1.03778
672.89	1.11108
672.91	1.07864
672.93	1.12694
672.94	1.26394
672.95	1.14687
672.97	1.32098
672.99	1.16571
673.01	1.41237
673.02	1.24701
673.03	1.10164
673.05	1.06227
673.07	1.05101
673.08	0.99259
673.09	0.976054
673.11	1.05288
673.13	1.1674
673.15	0.934013
673.17	0.921854
673.19	0.982667
673.2	1.04622
673.21	1.08214
673.23	1.19058
673.25	0.904648
673.27	0.981742
673.29	0.94657
673.31	0.99824
673.32	1.02651
673.33	0.985397
673.35	0.949336
673.37	1.03654
673.39	0.966888
673.41	0.923675
673.43	0.931739
673.45	0.978876
673.47	0.906962
673.49	0.77792
673.51	0.956293
673.53	0.910423
673.55	0.951464
673.57	0.939735
673.59	0.961911
673.61	1.03093
673.63	0.939417
673.65	0.881982
673.67	0.85429
673.69	0.853882
673.71	0.864017
673.73	0.793085
673.75	0.822644
673.77	0.827393
673.78	0.905612
673.79	0.941787
673.81	0.889188
673.83	0.92275
673.85	0.934662
673.86	1.08014
673.87	0.907136
673.89	0.8895
673.91	0.898187
673.92	0.895469
673.93	0.834277
673.95	0.807937
673.97	0.889016
673.98	0.805522
673.99	0.801354
674.01	0.691222
674.03	0.735746
674.05	0.75134
674.07	0.750932
674.09	0.785366
674.11	0.707534
674.14	0.683876
674.16	0.819756
674.18	1.04703
674.2	1.13127
674.22	1.17142
674.23	1.30797
674.24	1.29226
674.26	1.26081
674.28	1.13611
674.3	1.05837
674.32	1.15269
674.34	1.16075
674.36	1.23097
674.38	1.23873
674.4	1.0609
674.42	1.08398
674.44	1.01765
674.46	1.11265
674.48	1.09276
674.5	1.17572
674.51	1.04595
674.52	1.04141
674.54	1.02454
674.56	1.00622
674.58	1.03359
674.6	0.927752
674.62	0.930404
674.63	0.923647
674.64	0.763974
674.66	0.708362
674.67	0.6648
674.68	0.6829
674.7	0.697885
674.72	0.717942
674.74	0.85025
674.76	0.989161
674.78	1.25049
674.8	1.43696
674.82	1.36144
674.84	1.396
674.85	1.35092
674.86	1.35348
674.88	1.19595
674.9	1.18508
674.92	1.19337
674.94	1.0633
674.96	1.08092
674.98	1.06242
675	1.11597
675.02	1.14841
675.04	1.11891
675.06	1.14736
675.08	1.32861
675.1	1.30162
675.11	1.21001
675.12	1.24381
675.14	1.27016
675.16	1.218
675.18	1.19827
675.2	1.24043
675.22	1.28821
675.24	1.35595
675.26	1.27567
675.28	1.24922
675.3	1.32457
675.32	1.31025
675.34	1.44511
675.36	1.27015
675.38	1.29387
675.4	1.28148
675.41	1.36262
675.42	1.30624
675.44	1.33601
675.46	1.20986
675.48	1.10529
675.5	0.941869
675.53	1.323
675.55	1.29555
675.57	1.28659
675.58	1.26642
675.59	1.31103
675.61	1.26495
675.63	1.30308
675.65	1.158
675.67	1.18322
675.69	1.07371
675.7	1.15376
675.71	1.16701
675.73	1.21014
675.75	1.22185
675.77	1.3144
675.79	1.32843
675.81	1.35014
675.83	1.29094
675.85	1.3285
675.87	1.26881
675.89	1.25117
675.91	1.15287
675.92	0.974404
675.93	1.01015
675.95	1.26401
675.97	1.23352
675.99	1.27387
676.01	1.19328
676.03	1.26529
676.05	1.31349
676.06	1.34914
676.07	1.23779
676.09	1.24735
676.11	1.28045
676.13	1.23841
676.15	1.20391
676.17	1.25383
676.19	1.26657
676.21	1.2755
676.23	1.20649
676.25	1.15538
676.27	1.14157
676.29	1.1436
676.31	1.06919
676.33	1.0417
676.35	1.01591
676.37	2.62659
676.39	1.73606
676.4	1.2346
676.41	1.08885
676.43	1.06125
676.45	1.09775
676.47	1.01626
676.49	1.12878
676.51	1.1002
676.53	1.27889
676.55	1.28699
676.57	1
676.59	1.05268
676.61	0.884105
676.63	1.0606
676.65	1.23833
676.67	1.196
676.69	1.11111
676.71	1.06441
676.73	1.13329
676.75	1.09643
676.77	1.12547
676.79	1.19531
676.81	1.0991
676.83	1.20053
676.84	1.14483
676.85	1.12795
676.87	1.17618
676.89	1.10394
676.93	1.11559
676.95	1.18387
676.97	1.17959
676.99	1.12292
677.01	1.18157
677.03	1.11992
677.05	1.20247
677.07	1.13905
677.09	1.10613
677.1	1.10979
677.11	1.16762
677.13	1.15895
677.15	1.05911
677.17	1.16709
677.19	1.15592
677.21	1.20655
677.23	1.2343
677.25	1.16029
677.27	1.19375
677.29	1.2008
677.31	1.22002
677.33	1.14054
677.35	1.05948
677.37	1.09757
677.39	1.139
677.41	1.08879
677.43	1.11567
677.45	1.11589
677.47	1.14093
677.49	1.21152
677.51	0.981333
677.52	0.913328
677.53	0.871336
677.58	1.02582
677.59	0.981555
677.61	1.06367
677.63	0.96929
677.65	0.957256
677.66	1.06551
677.67	1.04827
677.69	0.978282
677.71	0.961866
677.73	0.982006
677.75	0.996943
677.77	0.930513
677.78	0.90807
677.79	0.864684
677.81	0.792548
677.83	0.82707
677.84	0.771457
677.85	0.755313
677.87	0.856973
677.88	0.737131
677.89	0.781612
677.91	0.773127
677.93	1.79042
677.94	1.11142
677.97	0.846637
677.99	0.905706
678.02	0.822222
678.03	0.750702
678.05	0.785903
678.07	0.753654
678.09	0.884966
678.13	1.00136
678.15	0.948708
678.17	0.874356
678.19	0.89766
678.2	0.896138
678.23	0.928749
678.25	0.965476
678.26	0.892606
678.29	1.28761
679.9	0.969227
679.91	1.09796
679.96	0.885897
679.97	1.06114
679.98	1.22556
680	0.80168
680.02	0.841385
680.04	0.834142
680.06	0.882353
680.07	0.92847
680.08	1.07429
680.1	0.800705
680.11	0.87012
680.12	0.929736
680.14	0.780874
680.15	0.726479
680.16	0.745191
680.19	1.02238
680.2	1.07253
680.22	1.0064
680.24	1.00199
680.26	0.805242
680.28	0.741026
680.29	0.769859
680.3	0.643087
680.32	0.690466
680.34	0.695002
680.36	0.757623
680.38	0.713155
680.4	0.849422
680.41	1.23148
680.42	1.50207
680.44	1.27898
680.46	1.56526
680.51	1.68759
680.52	1.68819
680.54	1.51887
680.56	1.41487
680.58	1.26998
680.6	1.29109
680.62	1.32704
680.64	1.07304
680.66	1.11225
680.67	1.10181
680.68	1.24268
680.7	1.33377
680.72	1.06299
680.74	1.11482
680.76	1.16037
680.78	1.22369
680.8	1.04288
680.81	1.04493
680.82	1.06411
680.84	1.08418
680.86	1.27903
680.88	0.988246
680.9	1.13848
680.92	1.15021
680.94	1.05501
680.95	1.09641
680.96	1.22393
680.98	0.949173
681	1.14664
681.02	0.849568
681.04	1.01588
681.05	0.951731
681.06	1.02354
681.08	0.959078
681.1	1.21125
681.12	0.904585
681.14	0.949574
681.16	0.99545
681.18	0.975655
681.2	1.06788
681.22	1.25795
681.24	1.01523
681.28	0.925884
681.3	0.884909
681.32	0.794763
681.34	0.905688
681.36	0.86109
681.38	0.907593
681.4	0.845486
681.42	0.939594
681.43	0.894607
681.44	0.92597
681.46	1.04811
681.47	1.00613
681.5	1.09968
681.51	1.00779
681.52	1.10175
681.53	0.986892
681.54	0.985743
681.56	1.25902
681.58	1.10584
681.6	1.1225
681.62	1.08651
681.64	1.0151
681.66	0.967119
681.68	0.851502
681.7	0.910434
681.72	0.82835
681.74	0.843103
681.76	0.898901
681.78	0.852551
681.8	0.908395
681.82	1.02859
681.84	0.722624
681.86	0.837223
681.88	0.866728
681.9	0.832921
681.92	0.819579
681.94	0.913749
681.96	0.817275
681.97	1.04161
681.98	1.09876
682	0.875516
682.02	1.02308
682.04	0.88255
682.06	0.91697
682.08	0.957956
682.1	0.980075
682.11	1.03057
682.14	1.1441
682.16	0.964389
682.17	1.00536
682.18	1.07007
682.22	1.19786
682.24	1.0426
682.26	0.987312
682.28	1.00809
682.3	1.03127
682.32	1.30844
682.34	0.945347
682.35	0.868135
682.36	0.822121
682.38	0.87861
682.4	0.866587
682.42	0.84588
682.44	0.852082
682.46	0.802351
682.48	0.933641
682.5	0.767494
682.52	0.824426
682.54	1.20953
682.55	1.11586
682.56	1.02984
682.58	0.972178
682.6	0.995091
682.64	0.894205
682.65	0.793984
682.66	0.824557
682.68	0.722865
682.7	0.70858
682.72	0.692369
682.73	0.732399
682.74	0.748261
682.76	0.829661
682.78	1.0796
682.79	1.01936
682.8	1.02923
682.82	1.07317
682.84	1.62057
682.86	1.28706
682.88	1.33117
682.9	1.50029
682.92	1.52822
682.94	1.64359
682.96	1.82594
682.99	1.49252
683	1.4302
683.02	1.26569
683.04	1.2328
683.06	1.15346
683.08	1.16182
683.1	1.16676
683.11	1.03013
683.12	1.05266
683.14	1.20954
683.16	1.11221
683.17	1.12439
683.18	1.16893
683.2	1.20482
683.22	1.21953
683.24	1.16327
683.26	1.15159
683.28	1.16704
683.3	1.3301
683.32	1.3015
683.34	1.48299
683.35	1.32637
683.36	1.27907
683.38	1.2124
683.4	1.18486
683.42	1.11831
683.44	1.14118
683.45	1.1983
683.46	1.24678
683.48	1.23046
683.5	1.10517
683.52	1.01826
683.54	1.18169
683.56	0.972288
683.58	1.14042
683.6	1.18346
683.62	1.12023
683.64	1.05259
683.66	1.20284
683.67	1.03223
683.68	1.00703
683.7	1.01481
683.72	1.02022
683.74	0.961668
683.76	0.957014
683.78	0.95486
683.8	0.998942
683.81	1.11948
683.82	1.24921
683.86	0.898672
683.88	1.01278
683.9	0.89392
683.91	0.909115
683.92	0.943737
683.94	0.970103
683.96	0.949155
683.98	0.869048
684	0.943728
684.02	0.859202
684.03	0.817794
684.04	0.881525
684.06	1.13966
684.08	0.899851
684.1	0.819161
684.12	0.946183
684.14	0.963732
684.16	1.06399
684.19	0.780293
684.2	0.744656
684.22	0.814593
684.24	0.774358
684.26	0.862526
684.28	0.848204
684.29	0.929168
684.3	1.13314
684.33	0.969403
684.34	1.10473
684.36	1.04668
684.38	1.25381
684.4	1.25601
684.42	1.26265
684.44	1.26424
684.46	1.37905
684.48	1.36616
684.5	1.46818
684.52	1.47851
684.53	1.57555
684.54	1.47737
684.56	1.42617
684.58	1.46672
684.6	1.38694
684.62	1.43185
684.64	1.3654
684.66	1.3948
684.67	1.3192
684.68	1.33717
684.7	1.29427
684.72	1.35478
684.74	1.35259
684.76	1.3031
684.78	1.24733
684.8	1.27689
684.81	1.14984
684.82	1.05737
684.84	1.31411
684.86	1.35854
684.87	1.32487
684.88	1.36705
684.9	1.23397
684.92	1.15467
684.94	1.1614
684.96	0.95745
684.98	1.04325
685	0.983019
685.02	0.931102
685.04	1.05261
685.06	0.994716
685.08	1.13929
685.1	0.930211
685.12	0.956801
685.13	1.0065
685.14	0.979569
685.16	0.975438
685.18	0.882657
685.2	0.938887
685.22	0.907756
685.24	0.865134
685.27	0.966641
685.28	1.33665
685.3	1.22523
685.32	1.18146
685.34	1.21073
685.36	1.17142
685.38	1.16797
685.4	1.09615
685.42	1.05445
685.44	0.938333
685.49	0.8621
685.5	0.883975
685.53	0.875404
685.54	0.966597
685.56	0.899357
685.58	0.912657
685.59	0.939679
685.62	0.853532
685.63	0.861648
685.64	0.853314
685.66	0.921179
685.68	0.984215
685.7	0.934532
685.72	1.06675
685.74	0.831645
685.76	0.881574
685.78	0.874222
685.8	1.10031
685.82	0.874839
685.84	0.892607
685.86	0.83688
685.88	0.767907
685.89	0.779127
685.9	0.874135
685.92	0.872712
685.94	0.861378
685.96	0.863123
685.98	0.862477
686	0.804677
686.02	0.89348
686.03	0.810869
686.04	1.13728
686.06	0.810907
686.08	0.832684
686.1	0.965736
686.11	1.05114
686.14	0.860665
686.16	0.79692
686.18	0.743348
686.2	0.823728
686.21	0.818777
686.22	0.759753
686.23	0.767182
686.26	0.775755
686.28	0.80474
686.3	0.818408
686.32	0.898456
686.34	0.697175
686.36	0.635505
686.38	0.690318
686.39	0.623435
686.4	0.656551
686.42	0.857489
686.44	0.660568
686.46	1.09733
686.48	1.30993
686.5	1.46304
686.52	1.55759
686.54	1.45717
686.56	1.48165
686.57	1.54823
686.58	1.39913
686.59	1.71782
686.6	1.89905
686.62	1.47323
686.64	1.42966
686.66	1.36527
686.68	1.31354
686.7	1.28186
686.72	1.48341
686.76	1.45714
686.78	1.39506
686.8	1.40066
686.82	1.41227
686.84	1.31102
686.86	1.33737
686.88	1.24116
686.9	1.19188
686.92	1.15555
686.94	1.20141
686.96	1.1602
686.98	1.14366
687	1.24754
687.02	1.07608
687.03	1.07586
687.04	1.08228
687.06	1.01838
687.08	1.19973
687.09	1.16646
687.1	1.339
687.12	1.22359
687.14	1.18267
687.16	1.17006
687.18	1.17409
687.2	1.08406
687.22	1.24636
687.24	1.08589
687.26	1.08554
687.27	1.14829
687.28	1.04699
687.3	1.11999
687.32	1.1114
687.34	0.97175
687.36	1.00348
687.38	1.03261
687.39	1.04496
687.4	0.963337
687.42	1.00728
687.44	1.04631
687.46	0.929555
687.48	1.05842
687.5	0.976752
687.52	0.945982
687.54	0.956816
687.56	1.01019
687.58	1.07243
687.6	1.70413
